# Supplementary material for: Boosting the mechanocatalytic hydrolysis of cellulose by using a vibratory disc mill and clay minerals
Source: Royal Society of Chemistry journal article supplement (doi:10.1039/d3re00158j), 2023-01-01
Supplement: d3re00158j1.pdf [file d3re00158j1.pdf]

*Supporting Information*

**Boosting the mechanocatalytic hydrolysis of cellulose  
by using the vibratory disc mill and clay minerals**

Takeshi Mori,<sup>\*a</sup> Yuta Ogawa,<sup>a</sup> Seiichio Yoshida,<sup>a</sup> Takema Sasaki<sup>a</sup>  
and Keiichiro Matsushima<sup>\*\*a</sup>

<sup>a</sup> Industrial Research Institute, Hokkaido Research Organization, Kita 19 Nishi 11, Kita-ku,  
Sapporo, Hokkaido 060-0819, Japan

\* Co-corresponding author: Takeshi Mori (mori-takeshi@hro.or.jp), Tel: +81- 11-747-2362,

Fax: +81-11-726-4057

\*\* Corresponding author: Keiichiro Matsushima (matsushima-keiichiro @hro.or.jp), Tel: +81-

11-747-2362, Fax: +81-11-726-4057

**Contents:**

Number of pages: 10

Number of figures: 8

Number of tables: 1

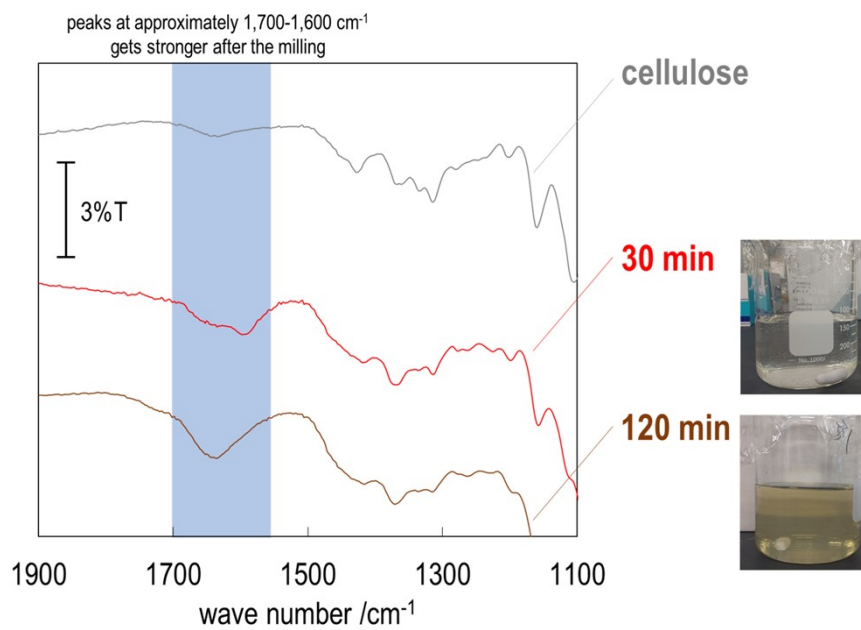

**Figure S1.** FTIR spectra of the water-soluble cellulose (catalyst: kaolin, milling time: 30 and 120 min.) and powder of cellulose used as a starting material.

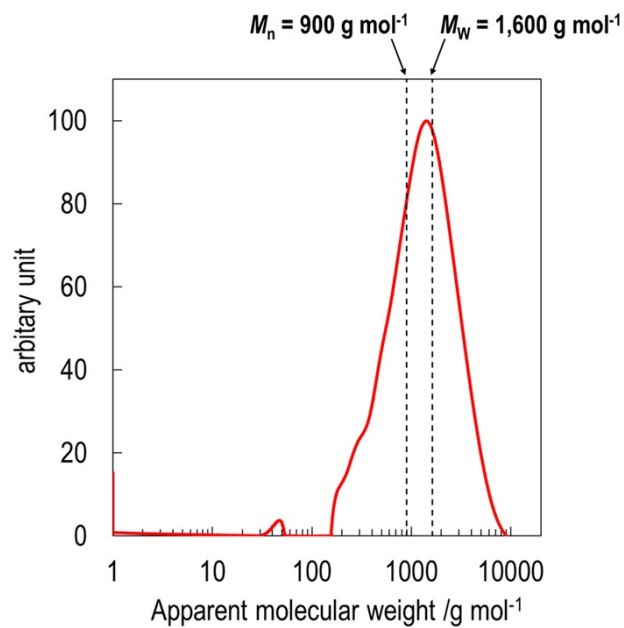

**Figure S2.** A molecular weight distribution of the water-soluble cellulose in the supernatant (substrate: cellulose (1.5 g), catalyst: kaolin (1.5 g), milling time: 180 min., milling machine: vibratory disc mill). The distribution, the number average molecular weight ( $M_n$ ) and the mass average molecular weight ( $M_w$ ) were calculated from the chromatogram measured by SEC.

**Table S1.** Composition analysis of the water-soluble cellulose by X-ray fluorescence spectrometer (catalyst: kaolin, milling time: 90 min.).

| element   | percentage in weight /% |
|-----------|-------------------------|
| oxygen    | 58.0                    |
| carbon    | 26.6                    |
| silicon   | 9.09                    |
| aluminum  | 5.26                    |
| potassium | 0.55                    |
| iron      | 0.32                    |
| sodium    | 0.11                    |
| chromium  | 0.05                    |
| calcium   | 0.04                    |
| sulfur    | 0.01                    |

| Milling machine                                       | Apparatus | Vessel | Milling mode                                                                     |
|-------------------------------------------------------|-----------|--------|----------------------------------------------------------------------------------|
| Vibratory disc mill<br>(9306C, Rigaku)                |           |        | <p data-bbox="1136 555 1310 618"><b>surface grinding<br/>by shear stress</b></p> |
| Attrition mill<br>(PWD, Nippon Coke &<br>Engineering) |           |        | <p data-bbox="1136 853 1310 909"><b>volume grinding<br/>by impact force</b></p>  |

**Figure S3.** Apparatus and milling modes of the mills used in this work (vibratory disc mill and the attrition mill)

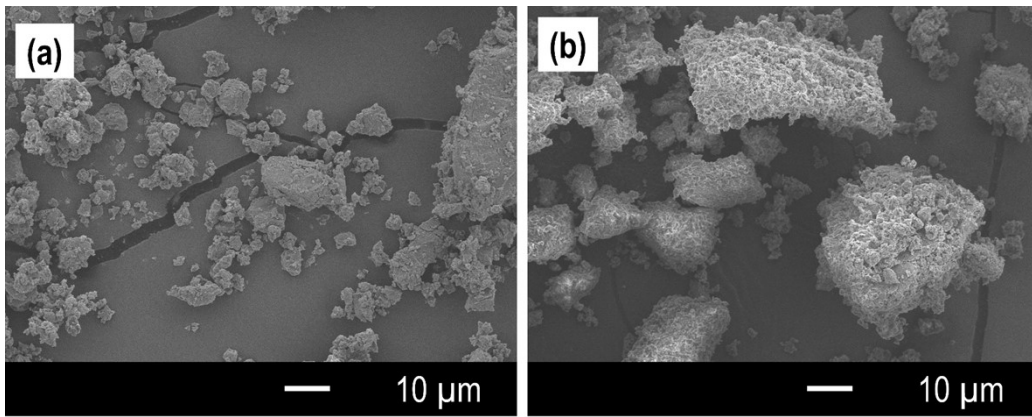

**Figure S4.** SEM images of the powder of cellulose and kaolin: (a) milled by the vibratory disc mill (90 min) and (b) the attrition mill (90 min).

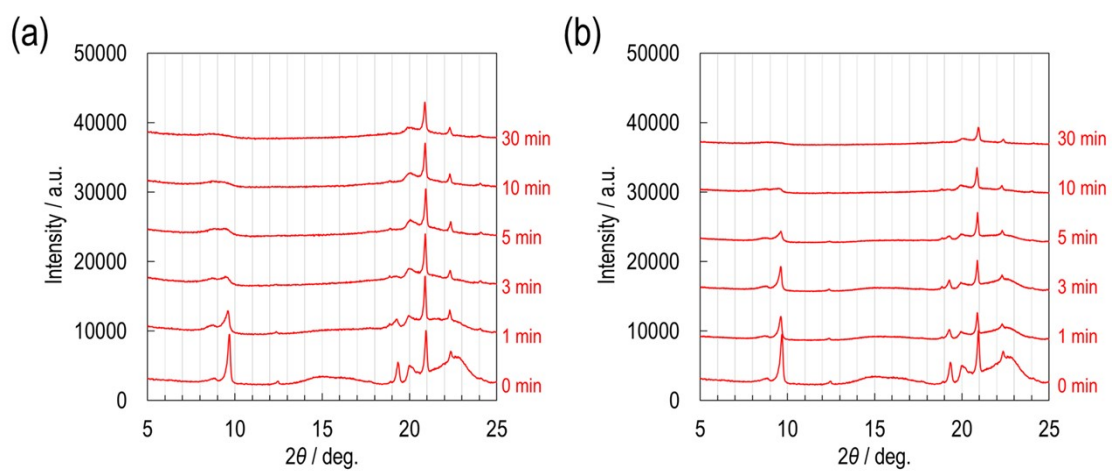

**Figure S5.** XRD patterns of the milled powder of cellulose and kaolin for various milling time (0-30 min): (a) the vibratory disc mill and (b) the attritor mill.

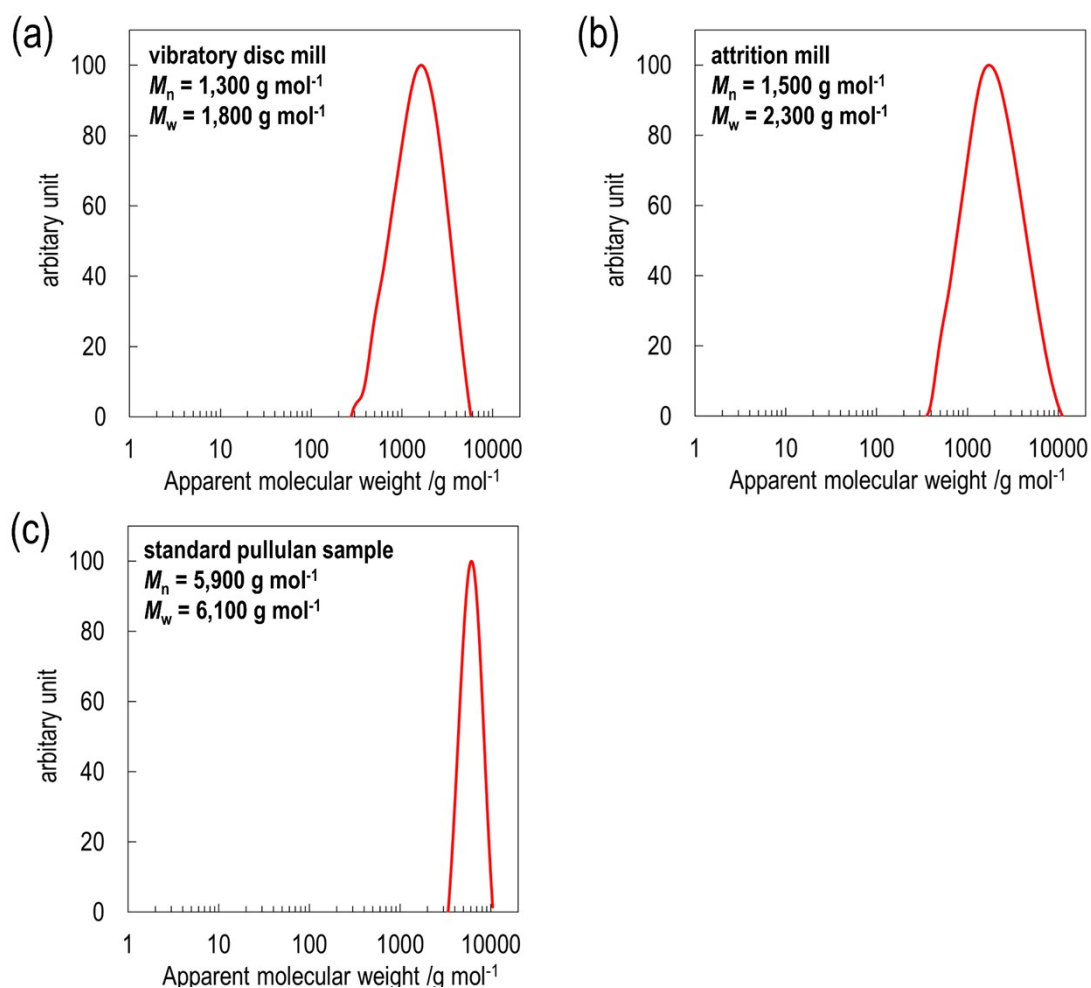

**Figure S6.** Molecular weight distributions of the water-soluble celluloses prepared by using various milling machines: (a) the vibratory disc mill and (b) the attrition mill (substrate: cellulose (1.5 g), catalyst: kaolin (1.5 g), milling time: 90 min). The distribution, the number average molecular weight ( $M_n$ ) and the mass average molecular weight ( $M_w$ ) were calculated from the chromatogram measured by HPLC. (c) is a molecular weight distribution of standard pullulan sample (a cello-oligosaccharide with a nominal  $M_w$  of 5,900 g mol<sup>-1</sup>) measured as a reference.



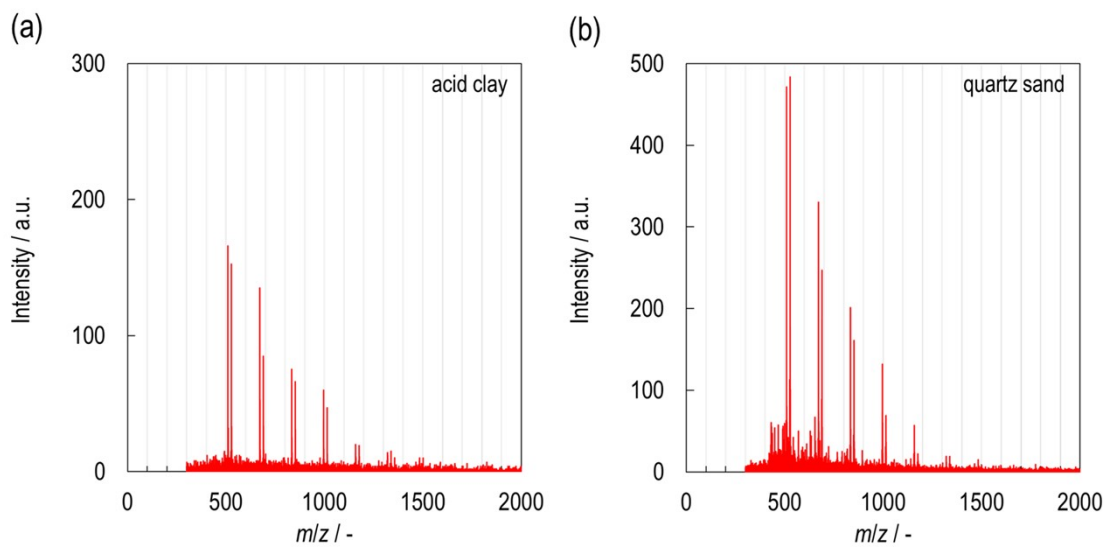

**Figure S7** Mass spectra of the water-soluble celluloses (milling time: 90 min): (a) clay and (b) quartz sand.

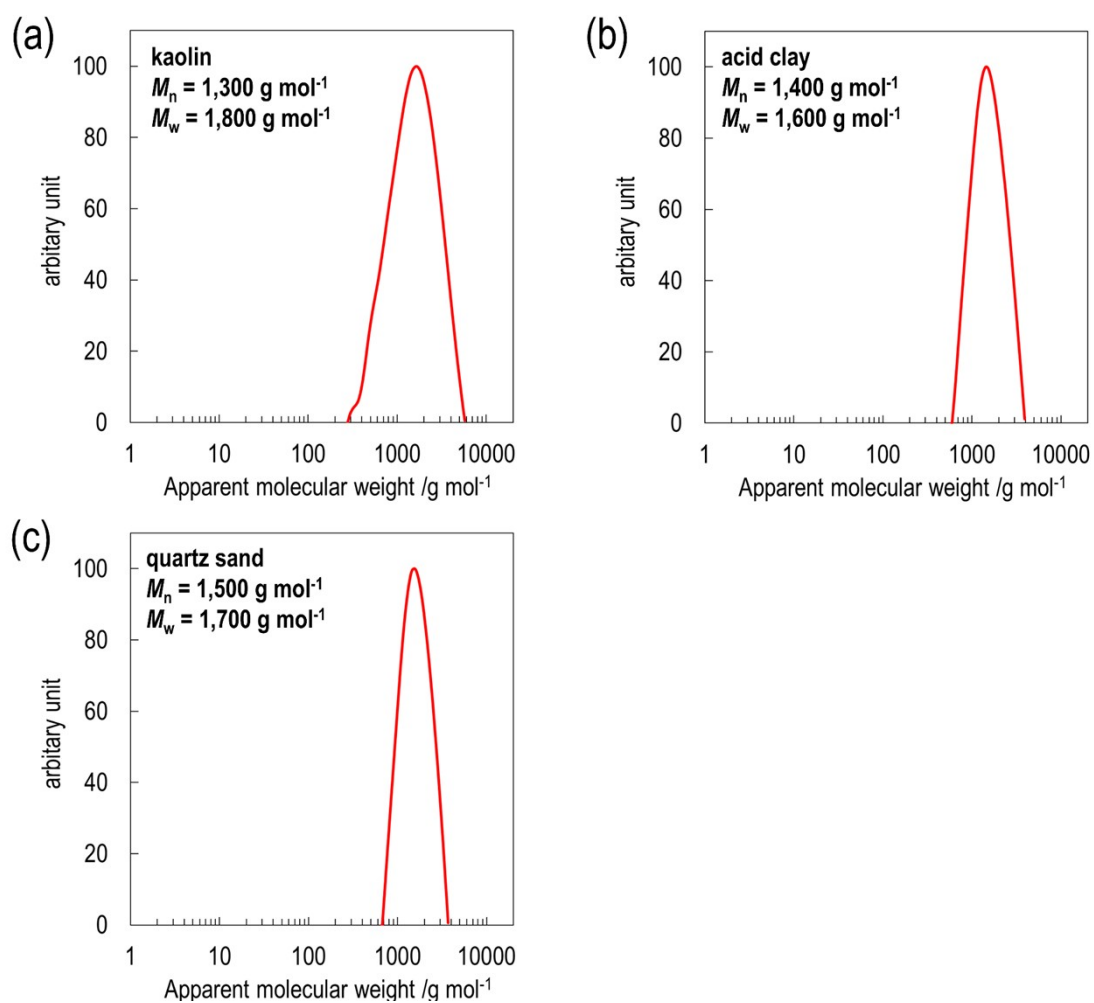

**Figure S8.** Molecular weight distributions of the water-soluble celluloses prepared by using various catalysts: (a) kaolin, (b) acid clay and (c) quartz sand (substrate: cellulose (1.5 g), catalyst (1.5 g), milling time: 90 min). The distribution, the number average molecular weight ( $M_n$ ) and the mass average molecular weight ( $M_w$ ) were calculated from the chromatogram measured by HPLC.
